# 1 **Characteristics and Determinants of Pulmonary Long** 2 **COVID**

3  
4 Michael John Patton<sup>1,2†</sup>, Donald Benson<sup>4</sup>, Sarah W. Robison<sup>3</sup>, Raval Dhaval<sup>3</sup>, Morgan L.  
5 Locy<sup>3</sup>, Kinner Patel<sup>3</sup>, Scott Grumley<sup>4</sup>, Emily B. Levitan<sup>5</sup>, Peter Morris<sup>3</sup>, Matthew Might<sup>2</sup>,  
6 Amit Gaggar<sup>3,6‡\*</sup>, and Nathaniel Erdmann<sup>7‡</sup>

7  
8 <sup>1</sup>Medical Scientist Training Program, Heersink School of Medicine, University of  
9 Alabama at Birmingham, Birmingham, AL, USA

10 <sup>2</sup>Hugh Kaul Precision Medicine Institute, University of Alabama at Birmingham,  
11 Birmingham, AL, USA

12 <sup>3</sup>Department of Medicine, Pulmonary, Allergy, & Critical Care Medicine Division,  
13 University of Alabama at Birmingham, AL, USA

14 <sup>4</sup>Department of Radiology, University of Alabama at Birmingham, AL, USA

15 <sup>5</sup>Department of Epidemiology, University of Alabama at Birmingham, AL, USA

16 <sup>6</sup>Birmingham VA Medical Center, Pulmonary Section, Birmingham, AL, USA

17 <sup>7</sup>Department of Medicine, Division of Infectious Diseases, University of Alabama at  
18 Birmingham, AL, USA

19 † First Author

20 ‡ Co-senior Authors

21 \* Corresponding Author

22  
23 Michael John Patton, BA, MD, PhD candidate, [mjpatton@uab.edu](mailto:mjpatton@uab.edu)

24 Donald Benson, MD, PhD, [donaldbenson@uabmc.edu](mailto:donaldbenson@uabmc.edu)

25 Sarah W. Robison, MD, [srobison@uabmc.edu](mailto:srobison@uabmc.edu)

26 Raval Dhaval, MD, [draval@uabmc.edu](mailto:draval@uabmc.edu)

27 Morgan L. Locy, MD, PhD, [mllocy@uabmc.edu](mailto:mllocy@uabmc.edu)

28 Kinner Patel, MD, [kinnerpatel@uabmc.edu](mailto:kinnerpatel@uabmc.edu)

29 Scott Grumley, MD, [sgrumley@uabmc.edu](mailto:sgrumley@uabmc.edu)

30 Emily B. Levitan, ScD, [emilylevitan@uabmc.edu](mailto:emilylevitan@uabmc.edu)

31 Peter Morris, MD, [pmorris@uabmc.edu](mailto:pmorris@uabmc.edu)

32 Matthew Might, PhD, [might@uab.edu](mailto:might@uab.edu)

33 Amit Gaggar\*, MD, PhD, Email: [agaggar@uabmc.edu](mailto:agaggar@uabmc.edu), Address: Bevill Research  
34 Building, 845 19<sup>th</sup> Street South, Birmingham, AL, 35294, Phone: 205-934-4304

35 Nathaniel Erdmann, MD, PhD, [nberdmann@uabmc.edu](mailto:nberdmann@uabmc.edu)

36  
37  
38 Word Count: 4777 (Abstract, Introduction, Results, Discussion, References, Legends)

## 40 **STRUCTURED ABSTRACT**

### 41 **RATIONALE**

42 Persistent cough and dyspnea are prominent features of post-acute sequelae of SARS-  
43 CoV-2 (termed 'Long COVID'); however, physiologic measures and clinical features  
44 associated with these pulmonary symptoms remain poorly defined.

### 45 **OBJECTIVES**

46 Using longitudinal pulmonary function testing (PFTs) and CT imaging, this study aimed  
47 to identify the characteristics and determinants of pulmonary Long COVID.

### 48 **METHODS**

49 The University of Alabama at Birmingham Pulmonary Long COVID cohort was utilized to  
50 characterize lung defects in patients with persistent pulmonary symptoms after  
51 resolution primary COVID infection. Longitudinal PFTs including total lung capacity (TLC)  
52 and diffusion limitation of carbon monoxide (DLCO) were used to evaluate restriction  
53 and diffusion impairment over time in this cohort. Analysis of chest CT imaging was  
54 used to phenotype the pulmonary Long COVID pathology. Risk factors linked to  
55 development of pulmonary Long COVID were estimated using univariate and  
56 multivariate logistic regression models.

### 57 **MEASUREMENTS AND MAIN RESULTS**

58 Longitudinal evaluation 929 patients with post-COVID pulmonary symptoms revealed  
59 diffusion impairment (DLCO  $\leq$ 80%) and restriction (TLC  $\leq$ 80%) in 51% of the cohort  
60 (n=479). In multivariable logistic regression analysis (adjusted odds ratio; aOR, 95%

61 confidence interval [CI]), invasive mechanical ventilation during primary infection  
62 conferred the greatest increased odds of developing pulmonary Long COVID with  
63 diffusion impaired restriction (aOR=10.9 [4.09-28.6]). Finally, a sub-analysis of CT  
64 imaging identified evidence of fibrosis in this population.

## 65 **CONCLUSIONS**

66 Persistent diffusion impaired restriction was identified as a key feature of pulmonary  
67 Long COVID. Subsequent clinical trials should leverage combined symptomatic and  
68 quantitative PFT measurements for more targeted enrollment of pulmonary Long COVID  
69 patients.

70

71

72

73

74

75

76

77

78

79

80

81

82

83

## 84 INTRODUCTION

85 A major consequence of the COVID-19 pandemic has been the complex and  
86 frequently debilitating post-acute sequelae of SARS-CoV-2 infection (PASC, also termed  
87 'Long COVID'), estimated to occur in 10% of patients after primary infection.<sup>1,2</sup> To date,  
88 over 150 distinct Long COVID symptoms involving every major organ system have been  
89 reported.<sup>3</sup> Recent efforts to develop a consensus definition for Long COVID using  
90 symptom clustering have highlighted broad disease sub-types associated with chronic  
91 fatigue, post-exertional malaise, brain fog, and loss of smell or taste.<sup>4</sup> These efforts  
92 represent an important first step for Long COVID research; however, characterizing  
93 discreet endotypes with widely available quantitative physiologic measurements is  
94 essential for standardizing Long COVID diagnosis and management.

95 Prolonged pulmonary symptoms, notably dyspnea and cough, are among the most  
96 commonly reported manifestations of Long COVID (hereon referred to as 'pulmonary  
97 Long COVID').<sup>4-6</sup> Although pulmonary symptoms are frequently reported, the underlying  
98 cause(s) and clinical trajectory of Long COVID patients suffering from these symptoms  
99 remains unclear. Prior studies have suggested diffusion impairment that resolves within  
100 1-year of hospitalization is a common feature of post-acute COVID-19.<sup>7-10</sup> Other post-  
101 acute COVID follow-up studies have reported radiologic evidence of lung pathology  
102 characterized by ground glass opacities and fibrotic changes.<sup>11-18</sup> These results have  
103 provided valuable insight into post-COVID lung pathology, but are limited by small cohort  
104 size and inherently biased towards post-acute COVID patients, rather than Long COVID  
105 populations presenting for persistent pulmonary complaints.

106 To address this knowledge gap, we leveraged a large, demographically diverse  
107 cohort exclusively comprised of Long COVID patients experiencing pulmonary  
108 symptoms persisting for  $\geq 1$  month after resolution of acute SARS-CoV-2 infection. Using  
109 longitudinal pulmonary function testing (PFT) and computerized tomography (CT)  
110 imaging, we identify specific disease features and risk factors linked to the development  
111 of pulmonary Long COVID. These presentations capture the population of patients with  
112 persistent clinical symptoms and reflect the natural history of pulmonary Long COVID.  
113 Lastly, we provide evidence for a novel endotype of Long COVID defined by persistent  
114 diffusion impairment and pulmonary restriction.

115

116

117

118

119

120

121

122

123

124

125

126

127

128

129

## 130 **METHODS**

### 131 **Study Design and Population**

132 This single-center, retrospective cohort study was performed among adult patients ( $\geq 18$   
133 years) with a positive COVID-19 PCR and/or rapid antigen test during the study window  
134 (03/2020-08/2023), followed by self- or physician referral to the University of Alabama at  
135 Birmingham (UAB) Post-COVID Pulmonary Clinic for complaint of unresolved respiratory  
136 symptoms. Pulmonary Long COVID was defined as pulmonary symptoms persisting for  
137  $\geq 1$  month that had developed  $\geq 28$  days after resolution of primary SARS-CoV-2  
138 infection. Baseline (1st visit) PFTs and CT scans were defined by the first date of the  
139 measurement within a window of 14-days prior to and 6-months after the patient's 1st  
140 Long COVID clinic visit date. Follow-up measurements (termed 2nd and 3rd visit) were  
141 restricted to the study window and had to occur after the first encounter measurement.  
142 The cohort was stratified by percent predicted diffusion capacity for carbon monoxide  
143 (DLCO; normal=DLCO  $>80\%$ , impaired=DLCO  $\leq 80\%$ ) and percent predicted total lung  
144 capacity (TLC) in accord with the American Thoracic Society consensus definition for  
145 restrictive lung disease. Lung restriction sub-groupings were (1) no restriction TLC  
146  $>80\%$ , (2) mild restriction TLC 71-80%, (3) moderate restriction TLC 51-70%, (4) severe  
147 restriction TLC  $\leq 50\%$ .<sup>19,20</sup> All pulmonary function studies were conducted utilizing the  
148 same equipment (Vyntus™ system from Vyair Medical Incorporated).

149

150

151

152

## 153 **Patient Variables Extracted from Electronic Medical Record and** 154 **Radiographic Images**

155 Clinical variables were extracted for all patients in the cohort including: advanced age  
156 ( $\geq 65$  years), biological sex, elevated BMI ( $\geq 30$ ), smoking history (never, former, or  
157 current smoker), pre-COVID vaccination status, ICU admission, COVID-19 severity  
158 (assessed using the WHO score system representing maximum oxygen therapy support  
159 required), and therapeutics (dexamethasone, remdesivir, days on a specific oxygen  
160 support device) during primary infection, SARS-CoV-2 variant, and months from primary  
161 infection to first Long COVID clinic visit.<sup>21</sup> Pre-COVID comorbidities (renal, pulmonary,  
162 heart failure or hypertension, diabetes, obstructive sleep apnea, and  
163 immunosuppression) were determined by physician review of medical records. Chest  
164 CT imaging was assessed by two blinded cardiothoracic radiologists for the presence or  
165 absence of 6 pulmonary imaging findings: lung consolidation, ground-glass opacities,  
166 reticulations, other fibrotic-like changes (i.e. architectural distortion, traction  
167 bronchiectasis and honeycombing; termed 'other fibrosis'), bronchiectasis, and  
168 emphysema (see eTable 3 for two-reader similarity evaluation). An overall severity score  
169 was determined using a previously defined image CT scoring system quantifying  
170 abnormalities in all 5 lung lobes with scores ranging from 0 (no involvement) to 25  
171 (multi-lobe involvement).<sup>22</sup> Detailed information on variables extracted can be found in  
172 the supplemental materials (eTable 1).

173

174

175

## 176 **Statistical Analysis**

177 Cohort statistics were reported with mean  $\pm$ standard deviation or median [Q1-Q3] in  
178 Table 1. Alluvial diagrams were used to assess relative DLCO and TLC improvement or  
179 decline in patients with 3-consecutive follow-ups visits (Figure 2C). Logistic regression  
180 models (unadjusted variable and multi-variable adjusted) were used to discover risk  
181 factors for developing diffusion impairment ( $DLCO \leq 80\%$ ) with severe or moderate  
182 restriction ( $TLC \leq 70\%$ ) at 1st Long COVID clinic visit (Table 2; see eTable 1 for details on  
183 model variables and eTables 5-7 for model sensitivity testing omitting patients without a  
184 primary COVID infection hospitalization and patients with pre-existing pulmonary  
185 comorbidities). All modeling results are reported as either unadjusted (OR) or adjusted  
186 odds ratios (aOR) with bootstrapped (n=1000 iterations) 95% confidence intervals (CI).  
187 All statistical analyses were performed using R (version 4.2, R Foundation).

188

189

190

191

192

193

194

195

196

197

198



199

## 200 **RESULTS**

### 201 **Study Population**

202 A total of 1,097 patients with prolonged pulmonary symptoms after primary  
203 SARSCoV-2 infection were identified based upon their evaluation in post-acute COVID  
204 pulmonary clinic. After exclusion, 929 patients with prolonged pulmonary symptoms  
205 (dyspnea, cough, or chest discomfort) lasting  $\geq 1$  month after resolution of primary  
206 SARS-CoV-2 infection and a subsequent PFT were included in this study (Figure 1,  
207 Table 1). To evaluate the role of pulmonary abnormalities in DLCO and evidence of pro-  
208 fibrotic processes, we stratified patients by diffusion impairment and severity of  
209 pulmonary restriction as measured by first post-acute PFT. Median time from primary  
210 SARS-CoV-2 infection to 1st Long COVID clinic visit was 125 days for diffusion impaired  
211 patients and 148 days for patients with normal diffusion capacity (Table 1). Patient age  
212 (mean,  $\pm$ SD) for the diffusion impaired group was  $56 \pm 13$  years compared to  $48 \pm 14$  years  
213 in the normal diffusion group (Table 1). For both groups, the majority of primary SARS-  
214 CoV-2 infections occurred during the alpha-variant wave (range: 62-63%), followed by  
215 21-23% and 15-16% occurring in the delta and omicron waves, respectively (eTable 2).  
216 Differences in primary pulmonary symptom reported at 1st Long COVID clinic visit were  
217 unremarkable between patients with and without diffusion impairment (range; dyspnea:  
218 76-79%, cough: 17-19%, chest discomfort: 4%).

219 We sought to determine how acute disease severity contributed to PFT findings for  
220 patients with pulmonary Long COVID. Acute disease severity was stratified by peak  
221 WHO ordinal score. Of the 73 patients who required invasive mechanical ventilation

222 (IMV), only 3 were in the normal diffusion capacity group (Table 1). Increased frequency  
223 and duration of oxygen support was observed among diffusion impaired patients with the  
224 severe restriction group (IMV: 32%, HFNC: 22%) exceeding that of the moderate (IMV:  
225 9%, HFNC: 16%), mild (IMV: 6%, HFNC: 14%), and no restriction groups (IMV: 3%,  
226 HFNC: 5%; Table 1). A similar trend of increased time of oxygen therapy (median [Q1-  
227 Q3]) during primary infection was also observed in diffusion impaired patients (IMV: 18  
228 [8-35] days; HFNC: 5 [3-8] days, and nasal cannula: 7 [4-11] days; eTable 2).  
229 Differences in vaccination, pre-existing pulmonary disease or obstructive sleep apnea,  
230 and smoking history prior to primary SARS-CoV-2 infection were minimal between  
231 diffusion impaired and normal groups (Table 1). Patients with diffusion impairment had a  
232 greater proportion of pre-existing diabetes (21%) and heart failure or hypertension (52%)  
233 compared to the normal diffusion group with 14% and 33%, respectively (Table 1).  
234 Cumulative lung involvement (25 points total, 5 points per lobe; median [Q1-Q3]) was  
235 higher in the diffusion impaired group (9 [1-17]) compared to the normal group (0 [0-2]).  
236 The degree of lung involvement on CT imaging for diffusion impaired patients correlated  
237 with increasing severity of lung restriction (none: 3 [1-7], mild: 3 [0-9], moderate: 7 [1-13],  
238 severe: 17 [9-21]; Table 1). Further characteristics of the cohort are presented in Table 1  
239 and eTable 2.

240

241

242

243

244

245

246

247

## 248 **Longitudinal Evaluation of Pulmonary Function Testing**

249 To assess physiological differences between patients with pulmonary Long COVID,  
250 we evaluated longitudinal PFTs over three total Long COVID visits. After 1st visit  
251 stratification, patients without diffusion impairment had, on average, normal lung  
252 capacity during the visit 2 visits (TLC 1st:  $82\pm 15\%$ , 2nd:  $79\pm 13\%$ ) with mild decline on  
253 3rd visit ( $72\pm 15\%$ ) compared to patients with diffusion impairment on respective follow-  
254 up visits (TLC 1st:  $65\pm 18\%$ , 2nd:  $65\pm 15\%$ , 3rd:  $64\pm 15\%$ ) (Figure 2A, eTable 4). Diffusion  
255 impaired patients with severe or moderate restriction experienced little to no  
256 improvement in TLC at 2nd (severe:  $51\pm 14\%$ , moderate:  $66\pm 11\%$ ) or 3rd visit (severe:  
257  $55\pm 14\%$ , moderate:  $65\pm 12\%$ ) (Figure 2A, eTable 4). Overall, patients with normal  
258 diffusion capacity at 1st visit maintained normal or above normal DLCO at the follow-up  
259 visits (DLCO 1st:  $95\pm 12\%$ , 2nd:  $93\pm 16\%$ , 3rd:  $90\pm 15\%$ ), regardless of the level of 1st  
260 visit restriction (Figure 2B, eTable 4). In contrast, patients with diffusion impairment at 1st  
261 visit remained, on average, diffusion impaired at all follow-up visits (DLCO 1st:  $59\pm 16\%$ ,  
262 2nd:  $66\pm 19\%$ , 3rd:  $65\pm 19\%$ ), with a clear association between worsening TLC and  
263 DLCO (Figure 2B, eTable 4). Additional PFT measurements are provided in eTable 4.

264 Alluvial diagrams were used to assess improvement or decline in diffusion  
265 impairment and restriction for patients with 3-consecutive PFTs at the UAB pulmonary  
266 Long COVID clinic (N=100, Figure 2C). Overall, we observed that the majority of  
267 patients with diffusion impairment and severe or moderate restriction at 1st visit had  
268 persistent restriction and diffusion impairment at 2nd and 3rd follow-up visits (Figure 2C).  
269 Improvement from diffusion impairment at any level of restriction was rare, with only 5

270 patients regaining normal TLC and DLCO by their 3rd visit. Over half of the normal  
271 diffusion capacity patients (n=11) had some level of lung restriction at 1st visit (n=1 mild,  
272 n=9 moderate, n=1 severe). Restriction or diffusion impaired restriction were the  
273 predominant phenotypes observed by the 3rd follow-up visit, thereby indicating an earlier  
274 stage of disease followed by progression among the normal diffusion capacity patients  
275 (Figure 2C).

## 276 **Risk Factors for Developing Pulmonary Long COVID with Severe** 277 **Pulmonary Restriction**

278 Logistic regression models were used to identify risk factors for developing Long  
279 COVID with combined diffusion impairment (DLCO  $\leq$ 80%) and severe or moderate  
280 restriction (TLC  $\leq$ 70%). Unadjusted univariable modeling revealed advanced age  $\geq$ 65  
281 years (OR=1.63 [1.23-2.23]), male sex (OR=1.88 [1.43-2.48]), renal disease (OR=2.48  
282 [1.47-4.15]), diabetes (OR=1.82 [1.30-2.51]), heart failure or hypertension (OR=2.54  
283 [1.98-3.32]), smoking history (OR=1.39 [1.03-1.86]), ICU admission (OR=6.15 [4.24-  
284 9.36]), and use of nasal cannula (OR=4.21 [2.90-6.07]), high-flow nasal cannula  
285 (OR=6.10 [3.92-9.82]), and invasive mechanical ventilation (OR=16.0 [8.87-34.4]) as  
286 independent risk factors for developing pulmonary Long COVID with severe or moderate  
287 restriction (Table 2). After adjusting for all variables, we observed that invasive  
288 mechanical ventilation conferred the greatest increased odds of developing pulmonary  
289 Long COVID with diffusion impairment and severe or moderate restriction (aOR=10.9  
290 [4.09-28.6]), followed by nasal cannula (aOR=4.0 [2.61-6.33]) and high-flow nasal  
291 cannula (aOR=3.86 [1.73-8.09]) use during primary SARS-CoV-2 infection, heart failure

292 or hypertension (aOR=2.09 [1.46-2.99]) and male sex (aOR=1.44 [1.03-1.98]; Table 2;  
293 reference group: un-hospitalized primary infection patients). In a sub-analysis using only  
294 hospitalized patients (WHO score 4-7), the association of invasive mechanical ventilation  
295 with diffusion impairment and severe or moderate restriction was comparable with whole  
296 cohort results (aOR=9.56 [3.22-32.6] vs. reference group of hospitalized room-air  
297 patients; eTable 5). To evaluate the potential effect of patients with pre-existing  
298 pulmonary comorbidities on our model results, further sensitivity testing was performed  
299 (eTables 6-7). Overall, the results show that invasive mechanical ventilation still  
300 conferred the greatest risk for development of pulmonary Long COVID with diffusion  
301 impairment and severe or moderate restriction (eTable 6, cohort sans patients with  
302 pulmonary comorbidities vs. reference group of non-hospitalized patients aOR=14.5  
303 [5.0-50.9]; eTable 7 cohort sans patients pulmonary comorbidities vs. reference group of  
304 hospitalized room-air patients aOR=15.2 [4.72-68.1]).

305

## 306 **Assessment of CT Imaging and Pathology**

307 CT imaging was performed on a total of 308 patients (33%; n=246 diffusion  
308 impaired sub-group, n=62 diffusion normal sub-group; Table 1). CT pathology and  
309 increased lung involvement were predominantly found in diffusion impaired patients with  
310 severe or moderate restriction. CT scoring of images taken within 6-months of the 1st  
311 Long COVID visit identified ground glass opacities (85%), reticulations (82%),  
312 bronchiectasis (69%), and fibrotic changes (65%) as the defining pathologies in the  
313 majority of diffusion impaired severe restriction patients (Figure 3A, eTable 2). A similar  
314 pathologic profile was found in diffusion impaired patients with moderate restriction

315 (Figure 3B). Univariable and multivariable logistic regression modeling was performed to  
316 determine if CT pathologies were associated with increased odds of developing  
317 pulmonary Long COVID with severe or moderate restriction (eTable 8). The significant  
318 unadjusted odds ratios for developing severe restriction were associated with ground  
319 glass opacities (OR=4.11 [2.50-6.96]), reticulations (OR=5.49 [3.24-9.35]), fibrotic  
320 changes (OR=5.27 [3.10-9.60]), bronchiectasis (OR=5.27 [3.10-9.60]), and consolidation  
321 (OR=2.35 [1.02-9.06]); however, only reticulations (aOR=2.12 [1.01-4.34]) maintained a  
322 significance in multivariable modeling (eTable 8).

323

324

325

326

327

328

329

330

331

332

333

334

335

336

337

338

339

340

341

## 342 **DISCUSSION**

343 Our current understanding of persistent pulmonary defects from SARS-CoV-2  
344 infection are primarily derived from prospective follow-up studies assessing patient  
345 outcomes after hospitalization with acute COVID-19. Gradual recovery of impaired  
346 diffusion capacity (DLCO  $\leq$ 80%) and radiographic evidence of fibrotic pulmonary tissue  
347 are among the most commonly reported observations.<sup>7-10,23-27</sup> Although these studies  
348 offer key insights into the trajectory of acute COVID recovery, characterizing patients  
349 without post-COVID symptoms limit the applicability of these findings to Long COVID  
350 patients with persistent dyspnea, cough, and chest discomfort. To address this  
351 knowledge gap, we leveraged a large, demographically diverse cohort comprised  
352 exclusively of Long COVID patients with persistent pulmonary symptoms. For this  
353 cohort, we aligned robust medical record data requiring no imputation, quantitative CT  
354 imaging, and longitudinal pulmonary function testing (PFT) to identify the characteristics  
355 and determinants of pulmonary Long COVID. Our study establishes a clear association  
356 between burden of acute COVID disease and the development of persistent lung  
357 restriction with diffusion impairment. Collectively, these results comprehensively define  
358 pathology for Long COVID that can be readily measured with PFTs and provides  
359 opportunity to better study the post-viral interplay of pulmonary symptoms with  
360 alterations in lung physiology.

361 Demographic risk factors (aOR [95% CI]) associated with the development of  
362 pulmonary Long COVID with diffusion impairment and severe or moderate restriction  
363 included male sex (aOR=1.44 [1.05-2.00]) and pre-existing heart failure and  
364 hypertension (aOR=2.07 [1.46-3.02]; Table 2, eTable 5). These findings differ from a



365 recent meta-analysis of multi-organ Long COVID symptoms that noted an elevated risk  
366 in females (aOR=1.56) and individuals over 40 years of age (aOR=1.21).<sup>28</sup> Our findings  
367 emphasize differences between the assessments obtained from broad symptom  
368 observations and physiological readouts in pinpointing at-risk populations. In Long  
369 COVID patients complaining of prolonged pulmonary symptoms, prior studies have  
370 suggested that dyspnea is a major feature and that symptoms can persist for months  
371 after initial infection.<sup>9,29</sup> Our study affirmed this observation with 78% (n=725) of the UAB  
372 pulmonary Long COVID cohort identifying dyspnea as the primary symptom, followed by  
373 18% (n=167) with cough and 4% (n=37) with chest discomfort (Table 1). Notably, the  
374 complaint of dyspnea remained consistent (>70%) across all degrees of diffusion  
375 impairment, restriction, and levels of lung involvement seen on CT imaging (Table 1,  
376 eTable 2). This suggests symptoms alone do not provide sufficient granularity to identify  
377 distinct endotypes of pulmonary Long COVID, thereby highlighting the importance of  
378 incorporating routine PFTs in the diagnostic evaluation of this patient population.

379 Our study demonstrates that the severity of hypoxia during primary SARS-CoV-2  
380 infection is a critical factor in the development of pulmonary Long COVID with persistent  
381 diffusion impairment and restriction (Table 2). Notably, the post-hospitalization PFT  
382 impairments in pulmonary Long COVID contrast with previously described post ARDS  
383 findings in non-COVID patients, where subjects predominately present with isolated  
384 diffusion impairment which improves to normal levels over a 6 month-1 year period and  
385 limited lung restriction at any time-point.<sup>30-33</sup> In addition to marked differences in lung  
386 physiology, the presence of reticulations, bronchiectasis, ground glass opacities, and  
387 fibrotic changes in pulmonary Long COVID CT images are distinct from ARDS which has  
388 been predominantly described by the presence of ground glass opacities and

389 reticulations.<sup>32</sup> Cumulatively, our physiologic and radiographic evidence suggest that  
390 pulmonary Long COVID is a pro-fibrotic disease process that is distinct from ARDS;  
391 however, future studies are warranted and needed to further elucidate the differences.

392 The biologic mechanisms underlying these symptomatic, physiologic, and  
393 radiographic changes are poorly understood, but there is increasing evidence that pro-  
394 fibrotic interstitial lung changes are occurring in dyspneic patients as early as 1 month  
395 post-COVID infection.<sup>18,34–36</sup> From a molecular perspective, several independent lines of  
396 evidence have shown that altered immune function, dysregulation of systemic  
397 neutrophilic signatures, and persistent inflammation and presence of viral antigens are  
398 associated with Long COVID.<sup>37–40</sup> While few studies have been conducted in the Long  
399 COVID lung, a prior spatial transcriptomic lung autopsy study from COVID-19 acute lung  
400 injury demonstrates a distinct fibro-proliferative phenotype relative to influenza  
401 infection.<sup>41</sup> If true, pulmonary fibrosis therapeutics like Nintedanib and Pirfenidone, which  
402 have been sparingly used in post-COVID associated fibrosis, may be uniquely suited for  
403 the subset of pulmonary Long COVID patients with diffusion impaired restriction.<sup>42,43,46</sup>  
404 This report provides novel definition of a distinct endotype of Long COVID and  
405 emphasizes the need to stratify patients for targeted therapeutic and clinical  
406 management.

407 This study has limitations. Due to the retrospective nature of the cohort, PFTs were  
408 not taken before or during primary SARS-CoV-2 infection, and therefore could not be  
409 compared to measurements taken at the first Long COVID clinic visit. While this large,  
410 demographically diverse cohort offers a unique opportunity to characterize pulmonary  
411 presentations of Long COVID, patients presented to the Long COVID clinic at different  
412 time intervals after primary COVID infection, and follow-ups were limited to attended

413 visits. Similarly, inherent bias towards more severe disease is present in patients who  
414 had CT imaging performed. Despite these limitations, the combination of an objective  
415 physiologic metric in longitudinal PFTs and a previously established Long COVID  
416 symptomatic signature provide an important foundation for future Long COVID studies.

417 Although dyspnea is present in a majority of pulmonary Long COVID patients,  
418 reported symptoms were not representative of the degree of diffusion impairment and  
419 restriction across the cohort.<sup>44</sup> The additional granularity provided with PFTs highlights  
420 the utility of a broadly available clinical test to identify pulmonary endotypes associated  
421 with persistent physiologic impairment. These insights underscore the need for medical  
422 providers to incorporate PFT measurements as a routine step for evaluating Long  
423 COVID patients with pulmonary complaints. Informed stratification of patients  
424 experiencing pulmonary Long COVID is critical as this population is likely to require high  
425 utilization of health care services and would likely benefit from early therapeutic  
426 interventions.<sup>45</sup>

427

428

429

430

431

432

433

434

435

436

437

438

439

440 **ACKNOWLEDGEMENTS**

441 **AUTHOR CONTRIBUTIONS**

442 Michael John Patton (MJP), Nathaniel Erdmann (NE), Donald Benson (DB), Scott  
443 Grumbley (SG), Emily B. Levitan (EBL), Amit Gaggar (AG), Sarah W. Robison (SWR),  
444 Raval Dhaval (RD), Kinner Patel (KP), Morgan L. Locy (MLL), Peter Morris (PM), and  
445 Matthew Might (MM) co-conceived the project, prepared the main text, and oversaw the  
446 UAB cohort creation. MJP processed and analyzed EMR data to create all tables and  
447 figures in the main text and supplement of this manuscript. DB analyzed and scored CT  
448 images. SG analyzed and scored a subset of CT images. We thank Dr. Jeanne  
449 Marrazzo, Dr. Surya Bhatt, and Dr. Mark Dransfield for contributing critical comments  
450 and additions to the main text and supplement. NE oversaw IRB approval from the  
451 University of Alabama at Birmingham (UAB IRBs: 300006291, 300006205). NE, MM,  
452 RD, and AG, obtained funding and supervised the overall study. All co-authors reviewed  
453 and approved the final version of the manuscript.

454

455 **FUNDING & DISCLOSURES**

456 This work was supported by the National Institute of Allergy and Infectious Diseases  
457 (AI156898, K08AI129705), the National Heart, Lung, and Blood Institute (HL153113,  
458 OTA21-015E, HL149944), and the COVID-19 Urgent Research Response Fund  
459 established by the Hugh Kaul Precision Medicine Network at the University of Alabama  
460 at Birmingham. No co-authors have any disclosures.

461

462

## 463 REFERENCES

- 464 1. Ballering, A. V., van Zon, S. K. R., Olde Hartman, T. C., Rosmalen, J. G. M. &  
465 Initiative, L. C. R. Persistence of somatic symptoms after COVID-19 in the  
466 Netherlands: an observational cohort study. *The Lancet* 2022; 400, 452–461.  
467 doi:10.1016/S0140-6736(22)01214-4
- 468 2. Bull-Otterson, L. et al. Post-COVID Conditions Among Adult COVID-19 Survivors  
469 Aged 18–64 and 65 Years —United States, March 2020–November 2021. *MMWR.*  
470 *Morbidity and Mortality Weekly Report* 71 2022. doi:10.15585/mmwr.mm7121e1
- 471 3. Davis, H. E., McCorkell, L., Vogel, J. M. & Topol, E. J. Long COVID: major findings,  
472 mechanisms and recommendations. *Nature Reviews Microbiology* 2023; 21, 133–  
473 146. doi:10.1038/s41579-022-00846-2
- 474 4. Thaweethai, T. *et al.* Development of a Definition of Postacute Sequelae of SARS-  
475 CoV-2 Infection. *The Journal of the American Medical Association* 2023; 329, 1934–  
476 1946. doi:10.1001/jama.2023.8823
- 477 5. Davis, H. E. et al. Characterizing long COVID in an international cohort: 7 months  
478 of symptoms and their impact. *EClinicalMedicine* 2021; 38, 101019.  
479 doi:10.1016/j.eclinm.2021.101019
- 480 6. Subramanian, A. et al. Symptoms and risk factors for long COVID in non-  
481 hospitalized adults. *Nature Medicine* 2022; 28, 1706–1714. doi:10.1038/s41591-  
482 022-01909-w
- 483 7. Wu, X. et al. 3-month, 6-month, 9-month, and 12-month respiratory outcomes in  
484 patients following COVID-19-related hospitalisation: a prospective study. *The*

- 485 Lancet Respiratory Medicine 2021; 9, 747–754. doi:10.1016/S2213-  
486 2600(21)00174-0
- 487 8. Huang, C. et al. 6-month consequences of COVID-19 in patients discharged from  
488 hospital: a cohort study. The Lancet 2021; 397, 220–232. doi:10.1016/S0140-  
489 6736(20)32656-8
- 490 9. Huang, L. et al. 1-year outcomes in hospital survivors with COVID-19: a longitudinal  
491 cohort study. The Lancet 2021; 398, 747–758. doi:10.1016/S0140-6736(21)01755-  
492 4
- 493 10. Evans, R. A. et al. Physical, cognitive, and mental health impacts of COVID-19 after  
494 hospitalisation (PHOSP-COVID): a UK multicentre, prospective cohort study The  
495 Lancet Respiratory Medicine 2021; 11, 1275-1287. doi:10.1016/S2213-  
496 2600(21)00383-0
- 497 11. Stewart, I. et al. Residual Lung Abnormalities after COVID-19 Hospitalization:  
498 Interim Analysis of the UKILD Post-COVID-19 Study. American Journal of  
499 Respiratory and Critical Care Medicine 2023; 207, 693–703.  
500 doi:10.1164/rccm.202203-0564OC
- 501 12. Yu, J. Z. et al. Lung perfusion disturbances in nonhospitalized post-COVID with  
502 dyspnea-A magnetic resonance imaging feasibility study. Journal of Internal  
503 Medicine 2022; 292, 941–956. doi:10.1111/joim.13558
- 504 13. Watanabe, A. et al. One-year follow-up CT findings in COVID-19 patients: A  
505 systematic review and meta-analysis. Respirology 2022; 27, 605–616.  
506 doi:10.1111/resp.14311
- 507 14. Baillie, J. K. et al. Multiorgan MRI findings after hospitalisation with COVID-19 in the

- 508 UK (C-MORE): a prospective, multicentre, observational cohort study. *The Lancet*  
509 *Respiratory Medicine* 2023; 11:1003-1019. doi:10.1016/S2213-2600(23)00262-X
- 510 15. So, M., Kabata, H., Fukunaga, K., Takagi, H. & Kuno, T. Radiological and functional  
511 lung sequelae of COVID-19: a systematic review and meta-analysis. *BMC*  
512 *Pulmonary Medicine* 2021; 21, 97. doi:10.1186/s12890-021-01463-0
- 513 16. Mandal, S. et al. 'Long-COVID': a cross-sectional study of persisting symptoms,  
514 biomarker and imaging abnormalities following hospitalisation for COVID-19.  
515 *Thorax* 2021; 76, 396–398. doi:10.1136/thoraxjnl-2020-215818
- 516 17. Liu, C. et al. Chest Computed Tomography and Clinical Follow-Up of Discharged  
517 Patients with COVID-19 in Wenzhou City, Zhejiang, China. *Annals of the American*  
518 *Thoracic Society* 202; 17, 1231–1237. doi:10.1513/AnnalsATS.202004-324OC
- 519 18. Mylvaganam, R. J., Bailey, J. I., Sznajder, J. I., Sala, M. A. & Consortium, N. C. C.  
520 C. Recovering from a pandemic: pulmonary fibrosis after SARS-CoV-2 infection.  
521 *European respiratory review* : an official journal of the European Respiratory  
522 Society 2021; 30. doi:10.1183/16000617.0194-2021
- 523 19. Pellegrino, R et al. Interpretative strategies for lung function tests. *The European*  
524 *Respiratory Journal* 2005; 26, 948–968. doi:10.1183/09031936.05.00035205
- 525 20. Stanojevic, S. et al. ERS/ATS technical standard on interpretive strategies for  
526 routine lung function tests. *The European Respiratory Journal* 2022; 60.  
527 doi:10.1183/13993003.01499-2021



- 528 21. Beigel, J. H. et al. Remdesivir for the Treatment of Covid-19 - Final Report. The  
529 New England Journal of Medicine 2020; 383, 1813–1826.  
530 doi:10.1056/NEJMoa2007764
- 531 22. Pan, F. et al. Time Course of Lung Changes at Chest CT during Recovery from  
532 Coronavirus Disease 2019 (COVID-19). Radiology 2020; 295, 715–721.  
533 doi:10.1148/radiol.2020200370
- 534 23. Nirmal, A. S. et al. Delayed lung function testing after COVID-19 to detect persistent  
535 lung function abnormalities - The DELTA - COVID-19 lung function study. Journal of  
536 family medicine and primary care 2022; 11, 7351–7356.  
537 doi:10.4103/jfmpe.jfmpe\_703\_22
- 538 24. Stockley, J. A. et al. Lung function and breathing patterns in hospitalised COVID-19  
539 survivors: a review of post-COVID-19 Clinics. Respiratory Research 2021; 22, 255.  
540 doi:10.1186/s12931-021-01834-5
- 541 25. Salem, A. M. et al. The Long-Term Impact of COVID-19 Pneumonia on the  
542 Pulmonary Function of Survivors. International journal of general medicine 2021;  
543 14, 3271–3280. doi:10.2147/IJGM.S319436
- 544 26. Stylemans, D. et al. Evolution of lung function and chest CT 6 months after COVID-  
545 19 pneumonia: Real-life data from a Belgian University Hospital. Respiratory  
546 Medicine 2021; 182, 106421. doi:10.1016/j.rmed.2021.106421
- 547 27. González, J. et al. Pulmonary Function and Radiologic Features in Survivors of  
548 Critical COVID-19: A 3-Month Prospective Cohort. Chest 2021; 160, 187–198.

549 doi:10.1016/j.chest.2021.02.062

550 28. Tsampasian, V. et al. Risk Factors Associated With Post-COVID-19 Condition: A  
551 Systematic Review and Meta-analysis. *JAMA internal medicine* 2023; 183, 566–  
552 580. doi:10.1001/jamainternmed.2023.0750

553 29. Cares-Marambio, K. et al. Prevalence of potential respiratory symptoms in survivors  
554 of hospital admission after coronavirus disease 2019 (COVID-19): A systematic  
555 review and meta-analysis. *Chronic Respiratory Disease* 2021; 18.  
556 doi:10.1177/14799731211002240

557 30. Herridge, M. S. et al. One-year outcomes in survivors of the acute respiratory  
558 distress syndrome. *The New England Journal of Medicine* 2003; 348, 683–693.  
559 doi:10.1056/NEJMoa022450

560 31. Herridge, M. S. et al. Functional disability 5 years after acute respiratory distress  
561 syndrome. *The New England Journal of Medicine* 2011; 364, 1293–1304.  
562 doi:10.1056/NEJMoa1011802

563 32. Masclans, J. R. et al. Quality of life, pulmonary function, and tomographic scan  
564 abnormalities after ARDS. *Chest* 2011; 139, 1340–1346. doi:10.1378/chest.10-2438

565 33. Lindén, V. B., Lidegran, M. K., Frisén, G, Dahlgren, P, Frenckner, B. P. & Larsen, F.  
566 ECMO in ARDS: a long-term follow-up study regarding pulmonary morphology and  
567 function and health-related quality of life. *Acta Anaesthesiologica Scandinavica*  
568 2009; 53, 489–495. doi:10.1111/j.1399-6576.2008.01808.x

- 569 34. Ambardar, S. R., Hightower, S. L., Huprikar, N. A., Chung, K. K., Singhal, A. &  
570 Collen, J. F. Post-COVID-19 Pulmonary Fibrosis: Novel Sequelae of the Current  
571 Pandemic. *Journal of clinical medicine* 2021; 10. doi:10.3390/jcm10112452
- 572 35. McGroder, C. F. et al. Pulmonary fibrosis 4 months after COVID-19 is associated  
573 with severity of illness and blood leucocyte telomere length. *Thorax* 2021; 76,  
574 1242–1245. doi:10.1136/thoraxjnl-2021-217031
- 575 36. Bazdyrev, E., Rusina, P., Panova, M., Novikov, F., Grishagin, I. & Nebolsin, V. Lung  
576 Fibrosis after COVID-19: Treatment Prospects. *Pharmaceuticals (Basel,*  
577 *Switzerland)* 2021; 14. doi:10.3390/ph14080807
- 578 37. Altmann, D. M., Whettlock, E. M., Liu, S., Arachchillage, D. J. & Boyton, R. J. The  
579 immunology of long COVID. *Nature Reviews Immunology* 2023; 23, 618-634.  
580 doi:10.1038/s41577-023-00904-7
- 581 38. George, P. M. et al. A persistent neutrophil-associated immune signature  
582 characterizes post-COVID-19 pulmonary sequelae. *Science Translational Medicine*  
583 2022; 14(671):eabo5795. doi:10.1126/scitranslmed.abo5795
- 584 39. Files, J. K. et al. Duration of post-COVID-19 symptoms is associated with sustained  
585 SARS-CoV-2-specific immune responses. *Journal of Clinical Investigation Insight*  
586 2021; 6(15):e151544. doi:10.1172/jci.insight.151544
- 587 40. Cevik, M., Tate, M., Lloyd, O., Maraolo, A. E., Schafers, J. & Ho, A. SARS-CoV-2,  
588 SARS-CoV, and MERS-CoV viral load dynamics, duration of viral shedding, and  
589 infectiousness: a systematic review and meta-analysis. *The Lancet Microbe* 2021;  
590 2, e13–e22. doi:10.1016/S2666-5247(20)30172-5

- 591 41. Margaroli, C. et al. Spatial mapping of SARS-CoV-2 and H1N1 lung injury identifies  
592 differential transcriptional signatures. *Cell reports Medicine* 2021; 2, 100242.  
593 doi:10.1016/j.xcrm.2021.100242
- 594 42. Zhou, X. et al. Case Report: Pirfenidone in the Treatment of Post-COVID-19  
595 Pulmonary Fibrosis. *Frontiers in medicine* 2022; 9:925703.  
596 doi:10.3389/fmed.2022.925703
- 597 43. Saiphoklang, N., Patanayindee, P. & Ruchiwit, P. The Effect of Nintedanib in Post-  
598 COVID-19 Lung Fibrosis: An Observational Study. *Critical care research and  
599 practice* 2022; 9972846. doi:10.1155/2022/9972846
- 600 44. Perlis, R. H. et al. Prevalence and correlates of long COVID symptoms among US  
601 adults. *JAMA Network Open* 2022; 5, e2238804.  
602 doi:10.1001/jamanetworkopen.2022.38804
- 603 45. Cutler, D. M. The costs of long COVID. *JAMA Health Forum* 2022; 3, e221809.  
604 doi:10.1001/jamahealthforum.2022.1809
- 605 46. Sgalla G, Leone PM, Gualano G, Simonetti J, Comes A, Verdirosi D, Di Gennaro F,  
606 Larici AR, Ianniello S, Cicchetti G, Fusco N, Pani M, Palmieri F, Richeldi L. A  
607 randomized trial of pamrevlumab in patients with COVID -19  
608 pneumonia. *Respirology* 2023; doi:10.1111/resp.14575.  
609  
610  
611  
612  
613  
614

## 615 **FIGURES & TABLES**

616 **Figure 1: Accrual of Long COVID Patients with Persistent Pulmonary Symptoms**  
 617

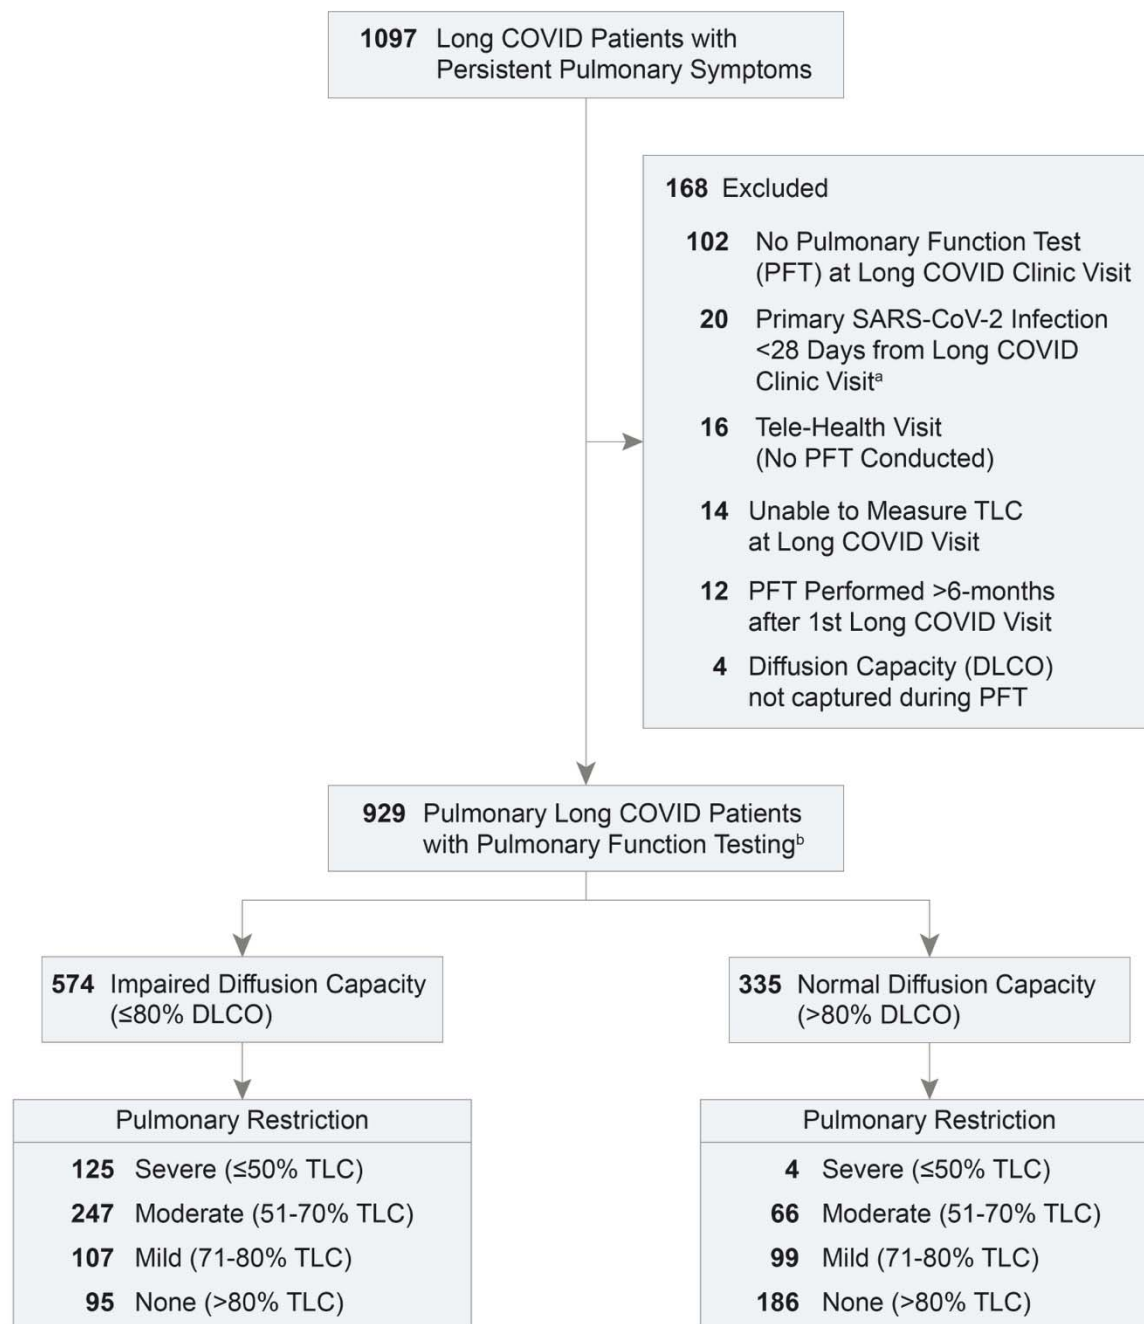

<sup>a</sup>Primary SARS-CoV-2 infection was defined as a positive result from a rapid antigen and/or polymerase chain reaction (PCR) test between 03/01/2020 - 08/01/2023

<sup>b</sup>Percent predicted diffusion capacity for carbon monoxide (DLCO) and total lung capacity (TLC) was assessed at the 1st pulmonary Long COVID clinic visit

618

**Table 1: Characteristics of Pulmonary Long COVID Patients Stratified by 1<sup>st</sup> Visit Diffusion Capacity and Restriction in the UAB Cohort**

|                              | Diffusion Impaired ( $\leq 80\%$ DLCO) |             |             |             |             | Diffusion Normal ( $> 80\%$ DLCO) |             |             |             |             |
|------------------------------|----------------------------------------|-------------|-------------|-------------|-------------|-----------------------------------|-------------|-------------|-------------|-------------|
|                              | Restriction:                           | Severe      | Moderate    | Mild        | None        | Restriction:                      | Severe      | Moderate    | Mild        | None        |
|                              | TLC:                                   | $\leq 50\%$ | 51-70%      | 71-80%      | $> 80\%$    | TLC:                              | $\leq 50\%$ | 51-70%      | 71-80%      | $> 80\%$    |
|                              | N=574                                  | n=125       | n=247       | n=107       | n=95        | N=355                             | n=4         | n=66        | n=99        | n=186       |
| Age <sup>1</sup>             | 56 $\pm$ 13                            | 58 $\pm$ 10 | 56 $\pm$ 13 | 56 $\pm$ 15 | 54 $\pm$ 15 | 48 $\pm$ 14                       | 41 $\pm$ 7  | 50 $\pm$ 15 | 50 $\pm$ 13 | 47 $\pm$ 14 |
| Sex                          |                                        |             |             |             |             |                                   |             |             |             |             |
| Female                       | 368 (64)                               | 59 (47)     | 153 (62)    | 78 (73)     | 78 (82)     | 241 (68)                          | 2 (50)      | 39 (59)     | 62 (63)     | 138 (74)    |
| Male                         | 206 (36)                               | 66 (53)     | 94 (38)     | 29 (27)     | 17 (18)     | 114 (32)                          | 2 (50)      | 27 (41)     | 37 (37)     | 48 (26)     |
| Race                         |                                        |             |             |             |             |                                   |             |             |             |             |
| White                        | 340 (59)                               | 65 (52)     | 131 (53)    | 70 (65)     | 74 (78)     | 250 (70)                          | 0 (0)       | 30 (45)     | 71 (72)     | 149 (80)    |
| African American             | 190 (33)                               | 47 (38)     | 101 (41)    | 25 (23)     | 17 (18)     | 71 (20)                           | 3 (75)      | 27 (41)     | 23 (23)     | 18 (10)     |
| Asian                        | 13 (2)                                 | 4 (3)       | 4 (2)       | 4 (4)       | 1 (1)       | 8 (2)                             | 0 (0)       | 3 (5)       | 2 (2)       | 3 (2)       |
| Hispanic American            | 9 (2)                                  | 3 (2)       | 3 (1)       | 3 (3)       | 0 (0)       | 5 (1)                             | 0 (0)       | 1 (2)       | 0 (0)       | 4 (2)       |
| Indian                       | 1 (0)                                  | 0 (0)       | 1 (0)       | 0 (0)       | 0 (0)       | 1 (0)                             | 0 (0)       | 0 (0)       | 0 (0)       | 1 (1)       |
| Multiple                     | 1 (0)                                  | 0 (0)       | 1 (0)       | 0 (0)       | 0 (0)       | 1 (0)                             | 0 (0)       | 0 (0)       | 0 (0)       | 1 (1)       |
| Refused                      | 10 (2)                                 | 5 (4)       | 1 (0)       | 2 (2)       | 2 (2)       | 13 (4)                            | 1 (25)      | 4 (6)       | 3 (3)       | 5 (3)       |
| Not Reported                 | 10 (2)                                 | 1 (1)       | 5 (2)       | 3 (3)       | 1 (1)       | 6 (2)                             | 0 (0)       | 1 (2)       | 0 (0)       | 5 (3)       |
| Body-mass Index <sup>1</sup> | 33 $\pm$ 9                             | 35 $\pm$ 10 | 34 $\pm$ 8  | 32 $\pm$ 7  | 30 $\pm$ 8  | 33 $\pm$ 9                        | 46 $\pm$ 14 | 36 $\pm$ 9  | 35 $\pm$ 9  | 32 $\pm$ 8  |
| Pre-COVID Comorbidities      |                                        |             |             |             |             |                                   |             |             |             |             |
| Pulmonary Disease            | 139 (24)                               | 25 (20)     | 61 (25)     | 27 (25)     | 26 (27)     | 72 (20)                           | 2 (50)      | 14 (21)     | 20 (20)     | 36 (19)     |
| Renal Disease                | 56 (10)                                | 10 (8)      | 30 (12)     | 13 (12)     | 3 (3)       | 10 (3)                            | 0 (0)       | 3 (5)       | 5 (5)       | 2 (1)       |
| Diabetes                     | 119 (21)                               | 32 (26)     | 55 (22)     | 24 (22)     | 8 (8)       | 49 (14)                           | 2 (50)      | 17 (26)     | 15 (15)     | 15 (8)      |
| Heart Failure/Hypertension   | 297 (52)                               | 71 (57)     | 146 (59)    | 49 (46)     | 31 (33)     | 118 (33)                          | 3 (75)      | 32 (48)     | 35 (35)     | 48 (26)     |
| Obstructive Sleep Apnea      | 116 (20)                               | 26 (21)     | 48 (19)     | 30 (28)     | 12 (13)     | 82 (23)                           | 2 (50)      | 21 (32)     | 25 (25)     | 34 (18)     |
| Smoking History              |                                        |             |             |             |             |                                   |             |             |             |             |
| Never smoker                 | 377 (66)                               | 82 (66)     | 157 (64)    | 71 (66)     | 67 (71)     | 260 (73)                          | 3 (75)      | 49 (74)     | 71 (72)     | 137 (74)    |
| Former smoker                | 170 (30)                               | 40 (32)     | 81 (33)     | 31 (29)     | 18 (19)     | 79 (22)                           | 1 (25)      | 13 (20)     | 24 (24)     | 41 (22)     |
| Current smoker               | 27 (5)                                 | 3 (2)       | 9 (4)       | 5 (5)       | 10 (11)     | 16 (5)                            | 0 (0)       | 4 (6)       | 4 (4)       | 8 (4)       |
| Vaccination Status           | 104 (18)                               | 22 (18)     | 51 (21)     | 18 (17)     | 13 (14)     | 80 (23)                           | 1 (25)      | 13 (20)     | 21 (21)     | 45 (24)     |

**Table 1: Characteristics of Pulmonary Long COVID Patients Stratified by 1<sup>st</sup> Visit Diffusion Capacity and Restriction in the UAB Cohort**

|                                                           | Diffusion Impaired (≤80% DLCO) |              |              |              |              | Diffusion Normal (>80% DLCO) |               |              |              |              |
|-----------------------------------------------------------|--------------------------------|--------------|--------------|--------------|--------------|------------------------------|---------------|--------------|--------------|--------------|
|                                                           | Restriction: Severe            | Moderate     | Mild         | None         |              | Restriction: Severe          | Moderate      | Mild         | None         |              |
| TLC:                                                      | ≤50%                           | 51-70%       | 71-80%       | >80%         |              | ≤50%                         | 51-70%        | 71-80%       | >80%         |              |
| N=574                                                     | n=125                          | n=247        | n=107        | n=95         |              | N=355                        | n=4           | n=66         | n=99         | n=186        |
| <b>Primary COVID Infection</b>                            |                                |              |              |              |              |                              |               |              |              |              |
| <b>COVID Severity</b>                                     |                                |              |              |              |              |                              |               |              |              |              |
| (3) No Admission                                          | 217 (38)                       | 20 (16)      | 96 (39)      | 46 (43)      | 55 (58)      | 260 (73)                     | 3 (75)        | 43 (65)      | 77 (78)      | 137 (74)     |
| (4) Room Air                                              | 60 (10)                        | 8 (6)        | 21 (9)       | 16 (15)      | 15 (16)      | 45 (13)                      | 0 (0)         | 10 (15)      | 11 (11)      | 24 (13)      |
| (5) Nasal Cannula                                         | 139 (24)                       | 29 (23)      | 69 (28)      | 24 (22)      | 17 (18)      | 32 (9)                       | 0 (0)         | 8 (12)       | 5 (5)        | 19 (10)      |
| (6) High-Flow Cannula                                     | 88 (15)                        | 28 (22)      | 40 (16)      | 15 (14)      | 5 (5)        | 15 (4)                       | 1 (25)        | 3 (5)        | 5 (5)        | 6 (3)        |
| (7) Ventilation                                           | 70 (12)                        | 40 (32)      | 21 (9)       | 6 (6)        | 3 (3)        | 3 (1)                        | 0 (0)         | 2 (3)        | 1 (1)        | 0 (0)        |
| ICU Admission                                             | 143 (25)                       | 66 (53)      | 56 (23)      | 15 (14)      | 6 (6)        | 20 (6)                       | 1 (25)        | 6 (9)        | 4 (4)        | 9 (5)        |
| <b>Long COVID Visit</b>                                   |                                |              |              |              |              |                              |               |              |              |              |
| <b>Primary Symptom</b>                                    |                                |              |              |              |              |                              |               |              |              |              |
| Dyspnea                                                   | 454 (79)                       | 111 (89)     | 196 (79)     | 78 (73)      | 69 (73)      | 271 (76)                     | 3 (75)        | 52 (79)      | 74 (75)      | 142 (76)     |
| Cough                                                     | 98 (17)                        | 12 (10)      | 42 (17)      | 22 (21)      | 22 (23)      | 69 (19)                      | 1 (25)        | 12 (18)      | 20 (20)      | 36 (19)      |
| Chest Discomfort                                          | 22 (4)                         | 2 (2)        | 9 (4)        | 7 (7)        | 4 (4)        | 15 (4)                       | 0 (0)         | 2 (3)        | 5 (5)        | 8 (4)        |
| Primary Infection to Long COVID Visit (days) <sup>2</sup> | 125 [72-222]                   | 115 [77-170] | 123 [67-221] | 120 [71-242] | 161 [81-256] | 148 [80-295]                 | 148 [117-216] | 150 [89-403] | 182 [81-320] | 135 [78-255] |
| TLC (%) <sup>1</sup>                                      | 65±18                          | 41±7         | 61±6         | 75±3         | 92±11        | 82±15                        | 49±1          | 64±5         | 75±3         | 93±12        |
| DLCO (%) <sup>1</sup>                                     | 59±16                          | 45±17        | 61±12        | 65±14        | 68±12        | 95±12                        | 89±6          | 92±10        | 92±8         | 98±14        |
| CT at 1st Long COVID Clinic Visit                         | 246 (43)                       | 91 (73)      | 113 (46)     | 28 (26)      | 14 (15)      | 62 (17)                      | 1 (25)        | 20 (30)      | 19 (19)      | 22 (12)      |
| CT Lung Involvement (0-25 Score) <sup>2</sup>             | 9 [1-17]                       | 17 [9-21]    | 7 [1-13]     | 3 [0-9]      | 3 [1-7]      | 0 [0-2]                      | 1 [1-1]       | 0 [0-2]      | 0 [0-2]      | 0 [0-2]      |
| Time from Long COVID Visit to CT Scan (days) <sup>2</sup> | 30 [7-82]                      | 30 [7-70]    | 28 [7-93]    | 26 [10-66]   | 36 [9-94]    | 21 [7-83]                    | 39 [39-39]    | 13 [7-55]    | 24 [10-64]   | 24 [2-95]    |

Statistics are reported as n, (%) unless otherwise specified by <sup>1</sup>Mean±SD or <sup>2</sup>Median [Q1-Q3]

N=total patients per diffusion capacity stratification group, n=total patients per restriction stratification group

Lung Involvement was assessed with a 0-5 scale (0=no involvement, 1=1-5%, 2=5-25%, 3=25-50%, 4=50-75%, 5≥75%)

Abbreviations: TLC, percent predicted total lung capacity; DLCO, diffusion limitation of carbon monoxide; CT, computerized tomography; WHO, World Health Organization; COVID, coronavirus disease; UAB, University of Alabama at Birmingham



**Figure 2: Diffusion Impaired Restriction is a Key Feature of Persistent Pulmonary Long COVID**

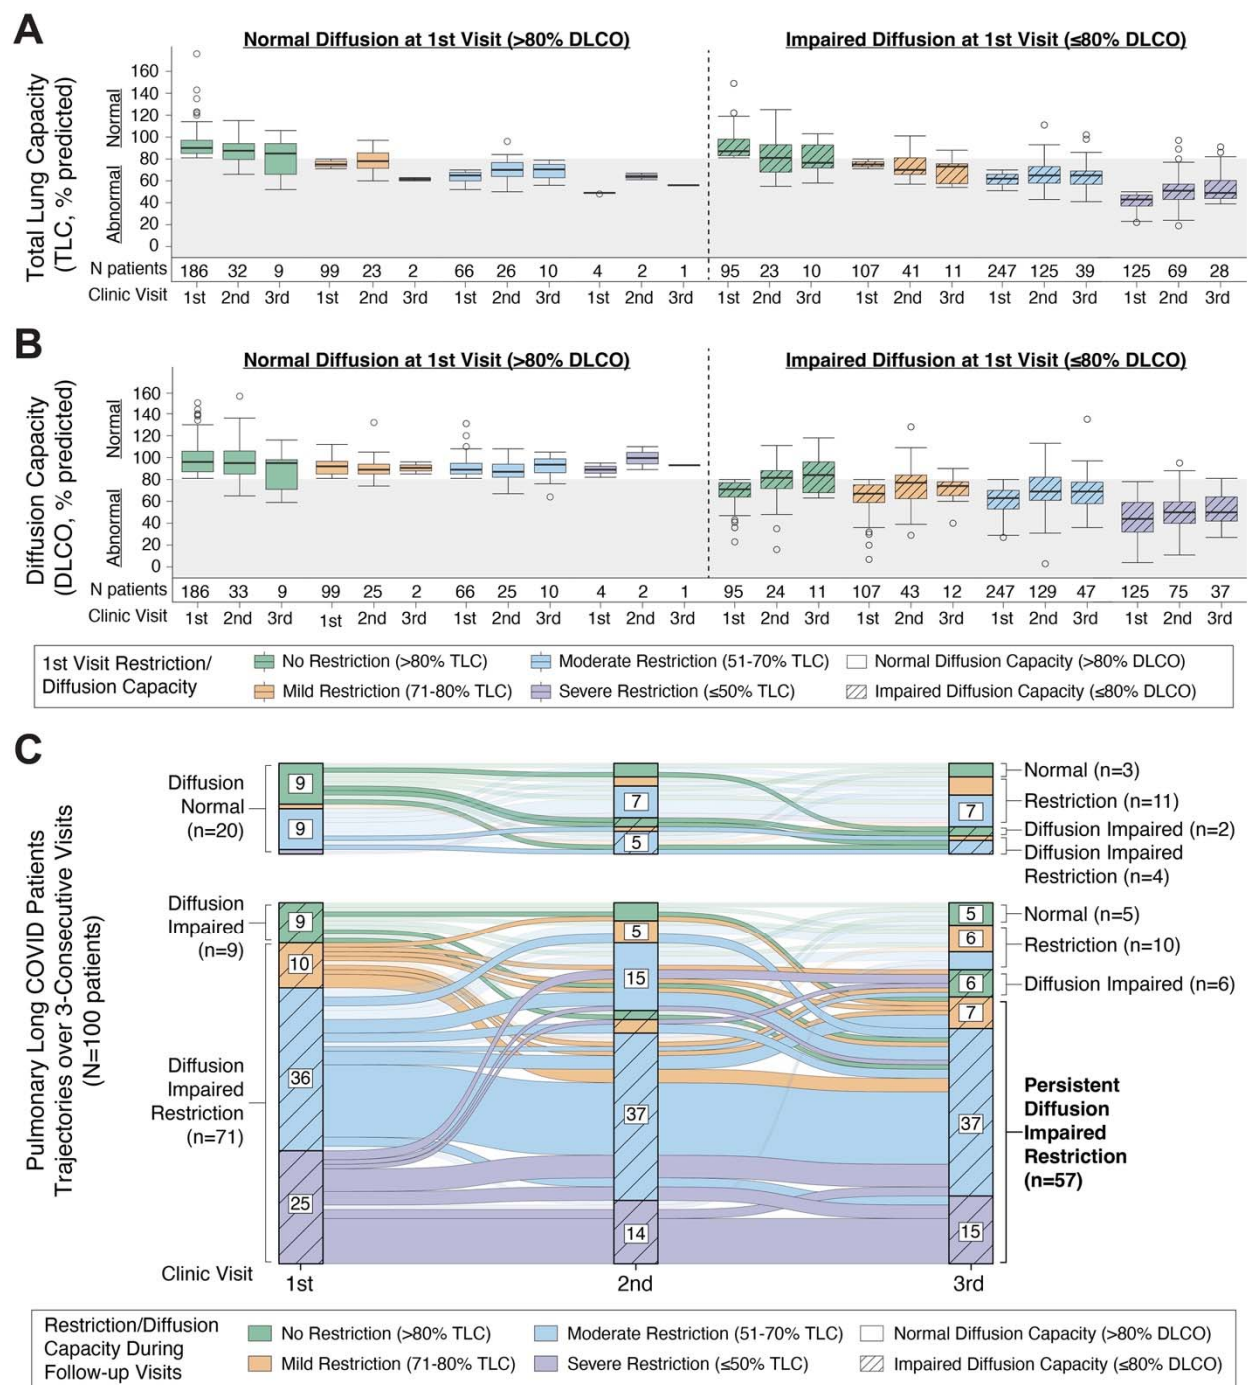

**Figure 2 Legend:** (A-B) Results of percent predicted total lung capacity (TLC) and diffusing capacity for carbon monoxide (DLCO) are shown for 3 clinic visits with stratification by restriction severity (color) measured during the 1st visit PFT and presence or absence of diffusion impairment (hashed lines). Boxplots represent the median black center line; 25th and 75th percentile box boundaries) for each PFT measured, with number of patients (N) reported below each group. Normal TLC and DLCO are denoted by the grey color on the plot at 80%. (C) Alluvial diagram displays patient PFT trajectories over 3-consecutive visits (N=100 total) with relative improvement or decline as measured by TLC (color) and DLCO (hashed lines). Labelling of alluvial diagram axes groups with <5 patients was omitted for visual clarity.

**Table 2: Risk Factors for Pulmonary Long COVID with Diffusion Impaired Restriction**

|                                                                     | Patients<br>Total N | Diffusion Impaired<br>Restriction <sup>2</sup><br>N (% of Total) | Diffusion Impaired<br>Restriction<br>Unadjusted OR [95% CI] <sup>1</sup> | Diffusion Impaired<br>Restriction<br>Adjusted OR [95% CI] <sup>1</sup> |
|---------------------------------------------------------------------|---------------------|------------------------------------------------------------------|--------------------------------------------------------------------------|------------------------------------------------------------------------|
| <b>Advanced Age</b>                                                 |                     |                                                                  |                                                                          |                                                                        |
| <65 years                                                           | 743                 | 280 (38)                                                         | —                                                                        | —                                                                      |
| ≥65 years                                                           | 186                 | 92 (49)                                                          | 1.63 [1.23-2.23]                                                         | 1.22 [0.81-1.88]                                                       |
| <b>Sex</b>                                                          |                     |                                                                  |                                                                          |                                                                        |
| Female                                                              | 609                 | 212 (35)                                                         | —                                                                        | —                                                                      |
| Male                                                                | 320                 | 160 (50)                                                         | 1.88 [1.43-2.48]                                                         | 1.44 [1.03-1.98]                                                       |
| <b>Elevated BMI</b>                                                 |                     |                                                                  |                                                                          |                                                                        |
| <30                                                                 | 376                 | 138 (37)                                                         | —                                                                        | —                                                                      |
| ≥30                                                                 | 553                 | 234 (42)                                                         | 1.28 [0.97-1.66]                                                         | 1.27 [0.91-1.77]                                                       |
| <b>Pulmonary Disease</b>                                            |                     |                                                                  |                                                                          |                                                                        |
| No                                                                  | 718                 | 286 (40)                                                         | —                                                                        | —                                                                      |
| Yes                                                                 | 211                 | 86 (41)                                                          | 1.04 [0.76-1.41]                                                         | 0.95 [0.67-1.36]                                                       |
| <b>Renal Disease</b>                                                |                     |                                                                  |                                                                          |                                                                        |
| No                                                                  | 863                 | 332 (38)                                                         | —                                                                        | —                                                                      |
| Yes                                                                 | 66                  | 40 (61)                                                          | 2.48 [1.47-4.15]                                                         | 1.03 [0.57-1.99]                                                       |
| <b>Diabetes</b>                                                     |                     |                                                                  |                                                                          |                                                                        |
| No                                                                  | 761                 | 285 (37)                                                         | —                                                                        | —                                                                      |
| Yes                                                                 | 168                 | 87 (52)                                                          | 1.82 [1.30-2.51]                                                         | 1.20 [0.79-1.78]                                                       |
| <b>Heart Failure or Hypertension</b>                                |                     |                                                                  |                                                                          |                                                                        |
| No                                                                  | 514                 | 155 (30)                                                         | —                                                                        | —                                                                      |
| Yes                                                                 | 415                 | 217 (52)                                                         | 2.54 [1.98-3.32]                                                         | 2.09 [1.46-2.99]                                                       |
| <b>Obstructive Sleep Apnea</b>                                      |                     |                                                                  |                                                                          |                                                                        |
| No                                                                  | 731                 | 298 (41)                                                         | —                                                                        | —                                                                      |
| Yes                                                                 | 198                 | 74 (37)                                                          | 0.88 [0.63-1.17]                                                         | 0.51 [0.32-0.72]                                                       |
| <b>Smoking History</b>                                              |                     |                                                                  |                                                                          |                                                                        |
| Never smoker                                                        | 637                 | 239 (38)                                                         | —                                                                        | —                                                                      |
| Current or Former Smoker                                            | 292                 | 133 (46)                                                         | 1.39 [1.03-1.86]                                                         | 1.25 [0.89-1.74]                                                       |
| <b>Vaccination Status</b>                                           |                     |                                                                  |                                                                          |                                                                        |
| No                                                                  | 745                 | 299 (40)                                                         | —                                                                        | —                                                                      |
| Yes                                                                 | 184                 | 73 (40)                                                          | 0.99 [0.72-1.39]                                                         | 1.34 [0.89-1.99]                                                       |
| <b>Months from Primary Infection<br/>to Long COVID Clinic Visit</b> |                     |                                                                  |                                                                          |                                                                        |
| 1-3 Months                                                          | 306                 | 132 (43)                                                         | —                                                                        | —                                                                      |
| 3-6 Months                                                          | 292                 | 139 (48)                                                         | 1.19 [0.88-1.64]                                                         | 0.96 [0.67-1.39]                                                       |
| 6-12 Months                                                         | 197                 | 59 (30)                                                          | 0.56 [0.38-0.81]                                                         | 0.70 [0.44-1.10]                                                       |
| >12 Months                                                          | 134                 | 42 (31)                                                          | 0.61 [0.40-0.89]                                                         | 0.64 [0.37-1.09]                                                       |
| <b>ICU Admission</b>                                                |                     |                                                                  |                                                                          |                                                                        |
| No                                                                  | 766                 | 250 (33)                                                         | —                                                                        | —                                                                      |
| Yes                                                                 | 163                 | 122 (75)                                                         | 6.15 [4.24-9.36]                                                         | 1.48 [0.71-3.27]                                                       |
| <b>COVID Severity (WHO Score)</b>                                   |                     |                                                                  |                                                                          |                                                                        |
| (3) No Admission                                                    | 477                 | 116 (24)                                                         | —                                                                        | —                                                                      |
| (4) Room Air                                                        | 105                 | 29 (28)                                                          | 1.20 [0.71-1.93]                                                         | 1.03 [0.57-1.73]                                                       |
| (5) Nasal Cannula                                                   | 171                 | 98 (57)                                                          | 4.21 [2.90-6.07]                                                         | 4.00 [2.61-6.33]                                                       |
| (6) High-Flow Cannula                                               | 103                 | 68 (66)                                                          | 6.10 [3.92-9.82]                                                         | 3.86 [1.73-8.09]                                                       |
| (7) Ventilation                                                     | 73                  | 61 (84)                                                          | 16.0 [8.87-34.4]                                                         | 10.9 [4.09-28.6]                                                       |

<sup>1</sup>Unadjusted odds ratio (OR) and adjusted odds ratio (aOR), 95% confidence interval (n=1000 bootstraps)

<sup>2</sup>Diffusion impaired restriction is defined by a DLCO ≤80% and a TLC ≤70% measured by PFT at the 1<sup>st</sup> Long COVID clinic visit

**Figure 3: CT Image Findings in Pulmonary Long COVID with Diffusion Impaired Restriction**

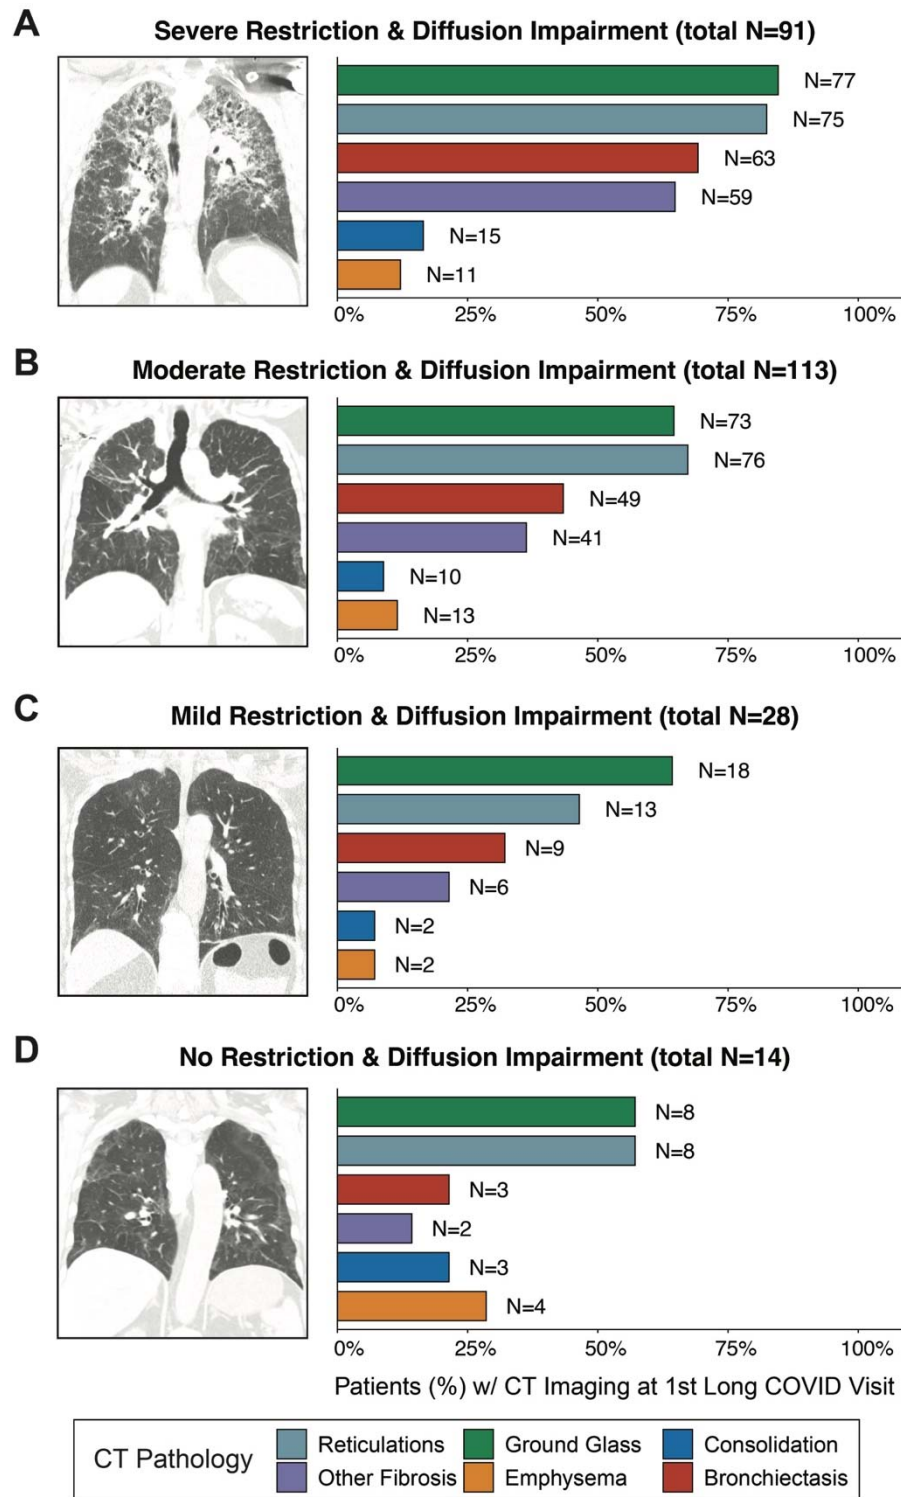

**Figure 3 Legend:** (A-D) Representative CT images of pulmonary Long COVID patients with diffusion impairment (DLCO  $\leq$ 80%) with severe (TLC  $\leq$ 50%), moderate (TLC 51-70%), mild (TLC 71-80%), and no restriction (TLC  $>$ 80%) assessed at the 1st Long COVID clinic visit. Corresponding barcharts of CT pathology (% , N=patients) are displayed for each group. (Note: architectural distortion, traction bronchiectasis and honeycombing are termed 'Other Fibrosis').
